# Supplementary material for: Pregnancy after Bariatric Surgery: A Nested Case-Control Study of Risk Factors for Small for Gestational Age Babies in AURORA
Source: MDPI journal article supplement (doi:10.3390/nu13051699), 2021-05-17
Supplement: s1 [file s1]

**Supplementary Material:** Pregnancy after bariatric surgery: a nested case-control study of risk factors for small for gestational age babies in *AURORA*

**Table S1. Missing data in the analysis dataset**

|                                       | <b>Total</b><br>n = 122 | <b>SGA</b><br>n = 25 | <b>AGA</b><br>n = 97 |
|---------------------------------------|-------------------------|----------------------|----------------------|
| <b>Infant sex</b>                     | 0                       | 0                    | 0                    |
| <b>Birth weight</b>                   | 0                       | 0                    | 0                    |
| <b>Gestational age</b>                | 0                       | 0                    | 0                    |
| <b>Age at delivery</b>                | 0                       | 0                    | 0                    |
| <b>Height</b>                         | 1 (0.8%)                | 0                    | 1 (0.8%)             |
| <b>Parity</b>                         | 7 (5.7%)                | 4 (16.0%)            | 3 (3.1%)             |
| <b>Preconception BMI</b>              | 1 (0.8%)                | 0                    | 1 (0.8%)             |
| <b>Pre-surgery BMI</b>                | 8 (6.6%)                | 1 (4.0%)             | 7 (7.2%)             |
| <b>Ethnicity</b>                      | 51 (41.8%)              | 11 (44.0%)           | 40 (41.2%)           |
| <b>Marital status</b>                 | 55 (45.1%)              | 14 (56.0%)           | 41 (42.3%)           |
| <b>Education level</b>                | 55 (45.1%)              | 14 (56.0%)           | 41 (42.3%)           |
| <b>Employment status</b>              | 55 (45.1%)              | 14 (56.0%)           | 41 (42.3%)           |
| <b>Method of conception</b>           | 3 (2.6%)                | 0                    | 3 (3.1%)             |
| <b>Type of bariatric surgery</b>      | 2 (1.6%)                | 0                    | 2 (2.1%)             |
| <b>GWG</b>                            | 5 (4.1%)                | 0                    | 5 (5.1%)             |
| <b>Nutritional advice</b>             | 51 (41.8%)              | 10 (40.0%)           | 41 (42.3%)           |
| <b>Smoking</b>                        | 58 (47.5%)              | 13 (52.0%)           | 45 (46.4%)           |
| <b>Sports and exercise</b>            | 60 (49.1%)              | 14 (56.0%)           | 46 (47.4%)           |
| <b>Haemoglobin</b>                    | 12 (9.8%)               | 3 (12.0%)            | 9 (9.3%)             |
| <b>RBC count</b>                      | 22 (18.0%)              | 7 (28.0%)            | 15 (15.5%)           |
| <b>Iron</b>                           | 73 (59.8%)              | 15 (60.0%)           | 58 (59.8%)           |
| <b>Folate</b>                         | 45 (36.9%)              | 12 (48.0%)           | 33 (34.0%)           |
| <b>Vitamin B12</b>                    | 19 (15.6%)              | 6 (24.0%)            | 13 (13.4%)           |
| <b>Calcium</b>                        | 91 (74.6%)              | 19 (76.0%)           | 72 (74.2%)           |
| <b>Vitamin D 25-OH</b>                | 35 (28.7%)              | 8 (32.0%)            | 27 (27.8%)           |
| <b>Albumin</b>                        | 46 (37.7%)              | 12 (48.0%)           | 34 (35.1%)           |
| <b>Gestational diabetes</b>           | 17 (13.9%)              | 6 (24.0%)            | 12 (12.4%)           |
| <b>Hypertension</b>                   | 3 (2.5%)                | 1 (4.0%)             | 2 (2.1%)             |
| <b>Surgery to conception interval</b> | 4 (3.3%)                | 0                    | 4 (4.1%)             |
| <b>Weight loss to conception</b>      | 8 (6.6%)                | 1 (4.0%)             | 7 (7.2%)             |
