# Supplementary material for: Pregnancy after Bariatric Surgery: A Nested Case-Control Study of Risk Factors for Small for Gestational Age Babies in AURORA
Source: MDPI journal article supplement (doi:10.3390/nu13051699), 2021-05-17
Supplement: s1 [file s1]

**Supplementary Material:** Pregnancy after bariatric surgery: a nested case-control study of risk factors for small for gestational age babies in *AURORA*

**Table S2. Sensitivity analyses examining the effect of maternal height on the association between maternal factors and SGA**

| Maternal factors                                     | Crude result<br>OR (95% CI) | p value | Maternal age<br>adjusted<br>OR (95% CI) | p value | <i>Sensitivity analyses</i><br>Maternal age and<br>height adjusted<br>OR (95% CI) | p value |
|------------------------------------------------------|-----------------------------|---------|-----------------------------------------|---------|-----------------------------------------------------------------------------------|---------|
| <b>Gestational weight gain,<br/>per kg</b>           | 0.92 (0.85-0.99)            | 0.029   | 0.92 (0.85-0.99)                        | 0.029   | 0.91 (0.85-0.98)                                                                  | 0.028   |
| <b>IOM GWG guidelines</b>                            |                             |         |                                         |         |                                                                                   |         |
| Inadequate                                           | 2.55 (0.82-7.94)            | 0.105   | 2.53 (0.81-7.88)                        | 0.109   | 2.65 (0.84-8.37)                                                                  | 0.096   |
| Recommended                                          | Reference group             | -       | Reference group                         | -       | -                                                                                 | -       |
| Excessive                                            | 0.52 (0.16-1.64)            | 0.265   | 0.50 (0.15-1.60)                        | 0.242   | 0.52 (0.16-1.69)                                                                  | 0.277   |
| <b>Nutritional advice</b>                            |                             |         |                                         |         |                                                                                   |         |
| Yes                                                  | 0.14 (0.04-0.51)            | 0.003   | 0.15 (0.04-0.56)                        | 0.005   | 0.11 (0.03-0.49)                                                                  | 0.004   |
| No                                                   | Reference group             | -       | Reference group                         | -       | Reference group                                                                   | -       |
| <b>Smoking in pregnancy</b>                          |                             |         |                                         |         |                                                                                   |         |
| Yes                                                  | 3.83 (0.88-16.69)           | 0.073   | 3.69 (0.83-16.39)                       | 0.086   | 3.84 (0.86-17.23)                                                                 | 0.079   |
| No                                                   | Reference group             | -       | Reference group                         | -       | Reference group                                                                   | -       |
| <b>Sports and exercise</b>                           |                             |         |                                         |         |                                                                                   |         |
| More than once a month                               | 0.29 (0.06-1.49)            | 0.140   | 0.28 (0.05-1.44)                        | 0.128   | 0.21 (0.04-1.20)                                                                  | 0.080   |
| Once a month or less                                 | Reference group             | -       | Reference group                         | -       | Reference group                                                                   | -       |
| <b>Pre-pregnancy BMI</b>                             |                             |         |                                         |         |                                                                                   |         |
| per 1kg/m <sup>2</sup> change                        | 0.90 (0.81-0.99)            | 0.038   | 0.89 (0.81-0.99)                        | 0.036   | 0.90 (0.81-1.00)                                                                  | 0.043   |
| per 5kg/m <sup>2</sup> change                        | 0.58 (0.35-0.97)            | 0.038   | 0.57 (0.34-0.96)                        | 0.036   | 0.59 (0.35-0.98)                                                                  | 0.043   |
| <b>Gestational diabetes</b>                          |                             |         |                                         |         |                                                                                   |         |
| Yes                                                  | 0.69 (0.21-2.29)            | 0.543   | 0.69 (0.21-2.30)                        | 0.549   | 0.66 (0.20-2.20)                                                                  | 0.498   |
| No                                                   | Reference group             | -       | Reference group                         | -       | Reference group                                                                   | -       |
| <b>Hypertension</b>                                  |                             |         |                                         |         |                                                                                   |         |
| Yes                                                  | 0.24 (0.01-4.37)*           | 0.336   | -                                       | -       | -                                                                                 | -       |
| No                                                   | Reference group             | -       | -                                       | -       | -                                                                                 | -       |
| <b>Surgery to conception<br/>interval, per month</b> | 1.00 (0.99-1.01)            | 0.890   | 1.00 (0.99-1.01)                        | 0.844   | 1.00 (0.99-1.01)                                                                  | 0.940   |
| <b>Type of surgery</b>                               |                             |         |                                         |         |                                                                                   |         |
| RYGB/BPD                                             | 1.28 (0.43-3.79)            | 0.658   | 1.31 (0.44-3.94)                        | 0.627   | 1.39 (0.46-4.21)                                                                  | 0.564   |
| LAGB/SG                                              | Reference group             | -       | Reference group                         | -       | Reference group                                                                   | -       |
| <b>Weight loss to<br/>conception, per kg</b>         | 1.02 (1.00-1.05)            | 0.100   | 1.02 (1.00-1.05)                        | 0.096   | 1.02 (1.00-1.05)                                                                  | 0.100   |

\*Hypertension OR was calculated using 0.5 substitution due to zero count in case group therefore no adjustments were made
